# Supplementary material
Source: PubMed Central journal article supplement (PMC6072466)
Supplement: MD-008-C7MD00170C-s001.pdf [file MD-008-C7MD00170C-s001.pdf]

**Electronic Supplementary Information**

**Theoretical models of inhibitory activity for  
inhibitors of protein-protein interactions:  
targeting menin-Mixed Lineage Leukemia with  
small molecules**

Wiktoria Jedwabny,<sup>†</sup> Szymon Kłossowski,<sup>‡</sup> Trupta Purohit,<sup>‡</sup> Tomasz Cierpicki,<sup>‡</sup>  
Jolanta Grembecka,<sup>\*,‡</sup> and Edyta Dyguda-Kazimierowicz<sup>\*,†</sup>

<sup>†</sup>*Department of Chemistry, Wrocław University of Science and Technology, Wrocław,  
Poland*

<sup>‡</sup>*Department of Pathology, University of Michigan, Ann Arbor, MI*

E-mail: jolantag@umich.edu; Edyta.Dyguda@pwr.edu.pl

## Characterization of menin-MLL inhibitors

Compounds **1**, **2**, **3**, **4**, **5**, **6**, and **7** were obtained from synthesis on demand from the contract research organization. All compounds were provided with the certificate of analysis and in addition were fully characterized in house by HR MS and NMR.

**6-(2-chloroethyl)-4-(4-(5,5-dimethyl-4,5-dihydrothiazol-2-yl)piperazin-1-yl)thieno[2,3-d]pyrimidine (1):**  $^1\text{H}$  NMR (600 MHz, METHANOL- $d_4$ )  $\delta_{\text{ppm}}$  8.40 (s, 1H), 7.44 (s, 1H), 4.20 (m, 4H), 3.83 - 3.98 (m, 8H), 3.39 (t,  $J = 6.42$  Hz, 2H), 1.69 (s, 6H);  $^{13}\text{C}$  NMR (151 MHz, DMSO- $d_6$ )  $\delta_{\text{ppm}}$  170.5, 166.2, 156.2, 150.2, 136.7, 117.9, 115.6, 59.9, 56.4, 48.9, 44.1, 42.4, 32.2, 25.0; HR-MS calc. for  $[\text{M}+\text{H}^+]$   $\text{C}_{17}\text{H}_{22}\text{ClN}_5\text{S}_2$ : 396.1083, found: 396.1079.

**6-propyl-4-(4-(5-(trifluoromethyl)-1,3,4-thiadiazol-2-yl)piperazin-1-yl)thieno[2,3-d]pyrimidine (2):**  $^1\text{H}$  NMR (600 MHz,  $\text{CDCl}_3$ )  $\delta_{\text{ppm}}$  1.02 (t,  $J = 7.3$  Hz, 3H), 1.77 (q,  $J = 8.07$  Hz, 2H), 2.89 (t,  $J = 7.5$  Hz, 2H), 3.78 - 3.85 (m, 4H), 4.01 - 4.10 (m, 4H), 6.98 (s, 1H), 8.51 (s, 1H);  $^{13}\text{C}$  NMR (150 MHz,  $\text{CDCl}_3$ )  $\delta_{\text{ppm}}$  13.6, 15.3, 24.4, 33.1, 46.1, 49.4, 65.9, 116.0, 117.7, 120.3, 143.8, 146.7, 151.8, 157.8, 168.3, 173.7; LR-MS  $[\text{M}+\text{H}^+]$  calc. for  $\text{C}_{16}\text{H}_{18}\text{F}_3\text{N}_6\text{S}_2$ : 415.09, found: 415.1.

**6-ethyl-4-(4-(5-(trifluoromethyl)-1,3,4-thiadiazol-2-yl)piperazin-1-yl)thieno[2,3-d]pyrimidine (3):**  $^1\text{H}$  NMR (600 MHz, DMSO- $d_6$ )  $\delta_{\text{ppm}}$  1.32 (t,  $J = 7.3$  Hz, 3H), 2.94 (q,  $J = 7.3$  Hz, 2H), 3.75 - 3.89 (m, 4H), 4.05 - 4.14 (m, 4H) 7.40 (m, 1H) 8.45 (s, 1H). LR-MS  $[\text{M}+\text{H}^+]$  calc. for  $\text{C}_{15}\text{H}_{16}\text{F}_3\text{N}_6\text{S}_2$ : 401.08, found: 401.0.

**2-(4-(6-(2,2,2-trifluoroethyl)thieno[2,3-d]pyrimidin-4-yl)piperazin-1-yl)-5-(trifluoromethyl)-1,3,4-oxadiazole (4):**  $^1\text{H}$  NMR (600 MHz,  $\text{CDCl}_3$ )  $\delta_{\text{ppm}}$  3.69 (q,  $J = 9.9$  Hz, 2H), 3.78 - 3.86 (m, 4H), 4.06 - 4.14 (m, 4H), 7.26 (m, 1H), 8.58 (m, 1H);  $^{13}\text{C}$  NMR (150 MHz,  $\text{CDCl}_3$ )  $\delta_{\text{ppm}}$  35.7, 45.5, 46.0, 117.1, 121.2, 128.8, 128.8, 152.4, 158.3, 164.4, 168.2; LR-MS  $[\text{M}+\text{H}^+]$  calc. for  $\text{C}_{15}\text{H}_{15}\text{F}_6\text{N}_6\text{OS}$ : 439.07, found: 439.1.

**6-cyclopropyl-4-(4-(5-(trifluoromethyl)-1,3,4-thiadiazol-2-yl)piperazin-1-yl)thieno[2,3-d]pyrimidine (5):**  $^1\text{H}$  NMR (600 MHz, DMSO- $d_6$ )  $\delta_{\text{ppm}}$  0.81 - 0.88 (m, 2H),

1.07 - 1.12 (m, 2H), 1.17 (t, J = 7.3 Hz, 1H), 3.77 - 3.83 (m, 4H), 4.02 - 4.07 (m, 4H), 7.25 - 7.38 (m, 1H), 8.32 - 8.44 (m, 1H); LR-MS [M+H<sup>+</sup>] calc. for C<sub>16</sub>H<sub>18</sub>F<sub>3</sub>N<sub>6</sub>S<sub>2</sub>: 413, found: 413.

**6-(methylthio)-4-(4-(5-(trifluoromethyl)-1,3,4-thiadiazol-2-yl)piperazin-1-yl)thieno[2,3-d]pyrimidine (6):** <sup>1</sup>H NMR (600 MHz, DMSO-d<sub>6</sub>) δppm 2.64 (s, 3H), 3.80 - 3.85 (m, 4H), 4.06 - 4.20 (m, 4H), 7.55 (s, 1H), 8.42 (s, 1H); <sup>13</sup>C NMR (150 MHz, DMSO-d<sub>6</sub>) δppm 19.1, 45.0, 48.8, 116.7, 121.3, 132.9, 134.4, 152.2, 156.5, 158.5, 168.8, 173.9; LR-MS [M+H<sup>+</sup>] calc. for C<sub>14</sub>H<sub>14</sub>F<sub>3</sub>N<sub>6</sub>S<sub>3</sub>: 419.03, found: 419.0.

**6-propyl-4-(4-(5-(trifluoromethyl)-4H-1,2,4-triazol-3-yl)piperazin-1-yl)thieno[2,3-d]pyrimidine (7):** <sup>1</sup>H NMR (600 MHz, DMSO-d<sub>6</sub>) δppm 0.96 (t, J = 7.3 Hz, 3H), 1.06 (q, J = 7.0 Hz, 2H), 1.71 (q, J = 7.3 Hz, 2H), 3.95 - 3.99 (m, 4H), 4.26 - 4.41 (m, 4H), 7.30 - 7.42 (m, 1H), 8.36 - 8.44 (m, 1H); LR-MS [M+H<sup>+</sup>] calc. for C<sub>16</sub>H<sub>18</sub>F<sub>3</sub>N<sub>7</sub>S: 398.13, found: 398.1.

Table S1: Amino acid residues and their closest distances<sup>a</sup> from inhibitor **MI-2-2**.

| Residue       | Residue type         | Distance from inhibitor <b>MI-2-2</b> |
|---------------|----------------------|---------------------------------------|
| Glu179        |                      | 4.0                                   |
| Asp285        | Negatively charged   | 4.9                                   |
| Glu363        |                      | 3.9                                   |
| Asp180–His199 | Neutral dimer        | 3.5                                   |
| Ser178        | Polar and neutral    | 3.4                                   |
| Asn282        |                      | 3.1                                   |
| His181        |                      | 3.5                                   |
| Ala182        |                      | 3.5                                   |
| Phe238        |                      | 3.6                                   |
| Cys241        | Nonpolar and neutral | 3.8                                   |
| Tyr276        |                      | 2.8                                   |
| Met278        |                      | 3.5                                   |
| Tyr319        |                      | 3.4                                   |
| Tyr323        |                      | 3.3                                   |

<sup>a</sup>The shortest distance between heavy atoms, in units of Å.

Table S2: Interaction energy values in kcal · mol<sup>-1</sup> at the consecutive levels of theory for each amino acid residue-inhibitor pair.

| Inhibitor     | Residue | $E_{EL,MTP}^{(10)}$ | $E_{EL}^{(10)}$ | $E^{(10)}$ | $E_{SCF}$ | $E_{MP2}$ | $E_{EL,MTP}^{(10)} + E_{Das}$ |
|---------------|---------|---------------------|-----------------|------------|-----------|-----------|-------------------------------|
| <b>MI-2-2</b> | Tyr276  | -11.4               | -15.5           | 1.7        | -3.8      | -7.0      | -18.9                         |
|               | Asn282  | -5.7                | -8.1            | 0.6        | -1.9      | -4.9      | -11.6                         |
|               | Met278  | -1.5                | -6.3            | 5.2        | 3.9       | -4.2      | -14.7                         |
|               | Glu179  | -4.4                | -4.8            | -4.1       | -5.4      | -6.3      | -7.1                          |
|               | Tyr323  | -0.3                | -3.1            | 4.5        | 3.6       | -2.9      | -11.0                         |
|               | Tyr319  | 1.3                 | -2.7            | 7.3        | 6.2       | -1.0      | -11.1                         |
|               | Ser178  | -1.6                | -2.2            | -0.6       | -1.2      | -2.4      | -3.9                          |
|               | Glu363  | -1.8                | -1.9            | -1.6       | -3.5      | -4.0      | -2.5                          |
|               | His181  | -0.7                | -1.8            | 2.6        | 2.0       | 0.0       | -7.1                          |
|               | Phe238  | -0.8                | -1.5            | 0.7        | 0.3       | -1.8      | -4.7                          |
|               | Asp285  | 1.4                 | 1.4             | 1.4        | 0.2       | -0.2      | 1.2                           |
|               | Cys241  | -0.4                | -1.0            | 1.2        | 0.8       | -1.0      | -3.3                          |
|               | Ala182  | -0.2                | -0.5            | 0.7        | 0.5       | -0.3      | -2.3                          |
| D180–H199     | 0.0     | -0.3                | 0.8             | 0.4        | -1.5      | -3.2      |                               |
| <b>MI-859</b> | Tyr276  | -10.5               | -14.5           | 2.6        | -2.7      | -6.1      | -17.9                         |
|               | Asn282  | -4.9                | -6.7            | -0.2       | -2.2      | -5.1      | -10.9                         |
|               | Met278  | -1.5                | -6.8            | 5.5        | 4.1       | -4.2      | -14.7                         |
|               | Glu179  | -3.3                | -3.5            | -3.0       | -4.2      | -5.2      | -5.9                          |
|               | Tyr323  | -1.1                | -3.3            | 3.8        | 2.8       | -3.4      | -11.8                         |
|               | Tyr319  | 1.5                 | -4.8            | 10.2       | 8.6       | 0.0       | -11.0                         |
|               | Ser178  | -1.5                | -2.2            | -0.3       | -0.9      | -2.2      | -3.8                          |
|               | Glu363  | -1.9                | -1.9            | -1.9       | -3.0      | -3.5      | -2.6                          |
|               | His181  | -1.1                | -2.5            | 1.9        | 1.3       | -0.7      | -6.8                          |

| Inhibitor     | Residue   | $E_{EL,MTP}^{(10)}$ | $E_{EL}^{(10)}$ | $E^{(10)}$ | $E_{SCF}$ | $E_{MP2}$ | $E_{EL,MTP}^{(10)} + E_{Das}$ |
|---------------|-----------|---------------------|-----------------|------------|-----------|-----------|-------------------------------|
| <b>MI-859</b> | Phe238    | -0.7                | -1.4            | 1.2        | 0.8       | -1.5      | -4.5                          |
|               | Asp285    | 1.0                 | 1.0             | 1.0        | -0.2      | -0.6      | 0.8                           |
|               | Cys241    | -0.5                | -1.0            | 0.9        | 0.6       | -1.1      | -3.4                          |
|               | Ala182    | 0.5                 | 0.0             | 1.3        | 1.1       | 0.2       | -1.5                          |
|               | D180-H199 | -1.0                | -1.2            | -0.2       | -0.6      | -2.1      | -4.2                          |
| <b>MI-319</b> | Tyr276    | -11.5               | -15.2           | 1.4        | -3.9      | -7.0      | -18.6                         |
|               | Asn282    | -5.2                | -7.4            | 0.7        | -1.6      | -4.6      | -11.8                         |
|               | Met278    | -1.9                | -6.9            | 4.5        | 3.0       | -4.8      | -14.5                         |
|               | Glu179    | -5.9                | -6.2            | -5.6       | -6.8      | -7.8      | -8.6                          |
|               | Tyr323    | -1.5                | -4.8            | 3.7        | 2.7       | -3.8      | -13.8                         |
|               | Tyr319    | 0.6                 | -2.4            | 5.8        | 4.7       | -2.1      | -9.5                          |
|               | Ser178    | -1.8                | -2.4            | -0.7       | -1.3      | -2.3      | -4.0                          |
|               | Glu363    | 2.0                 | 2.0             | 2.0        | 1.3       | 0.9       | 1.7                           |
|               | His181    | -1.8                | -3.0            | 1.1        | 0.6       | -1.2      | -7.4                          |
|               | Phe238    | -0.8                | -1.5            | 1.1        | 0.8       | -1.5      | -4.7                          |
|               | Asp285    | 3.7                 | 3.7             | 3.7        | 2.5       | 2.3       | 3.5                           |
|               | Cys241    | -0.9                | -1.4            | 0.9        | 0.5       | -1.2      | -4.0                          |
|               | Ala182    | 0.2                 | -0.1            | 0.8        | 0.7       | -0.1      | -1.6                          |
| D180-H199     | -0.8      | -1.2                | -0.1            | -0.5       | -2.4      | -4.2      |                               |
| <b>MI-2-3</b> | Tyr276    | -11.4               | -15.1           | 1.5        | -3.8      | -6.9      | -18.6                         |
|               | Asn282    | -5.2                | -7.4            | 0.7        | -1.6      | -4.6      | -11.8                         |
|               | Met278    | -1.9                | -6.9            | 4.5        | 3.0       | -4.9      | -14.5                         |
|               | Glu179    | -6.9                | -7.2            | -6.6       | -7.8      | -8.6      | -9.6                          |
|               | Tyr323    | -2.3                | -5.5            | 3.6        | 2.5       | -4.1      | -15.5                         |
|               | Tyr319    | 0.5                 | -2.5            | 5.7        | 4.6       | -2.2      | -9.7                          |

| Inhibitor     | Residue | $E_{EL,MTP}^{(10)}$ | $E_{EL}^{(10)}$ | $E^{(10)}$ | $E_{SCF}$ | $E_{MP2}$ | $E_{EL,MTP}^{(10)} + E_{Das}$ |
|---------------|---------|---------------------|-----------------|------------|-----------|-----------|-------------------------------|
| <b>MI-2-3</b> | Ser178  | -1.8                | -2.5            | -0.7       | -1.4      | -2.3      | -4.0                          |
|               | Glu363  | 1.8                 | 1.8             | 1.8        | 1.2       | 0.7       | 1.5                           |
|               | His181  | -1.8                | -3.0            | 1.1        | 0.5       | -1.3      | -7.5                          |
|               | Phe238  | -0.8                | -1.5            | 1.1        | 0.8       | -1.5      | -4.7                          |
|               | Asp285  | 5.4                 | 5.4             | 5.4        | 4.7       | 3.7       | 5.2                           |
|               | Ala182  | 0.2                 | -0.1            | 0.8        | 0.7       | -0.1      | -4.0                          |
|               | Cys241  | -0.9                | -1.4            | 0.9        | 0.5       | -1.1      | -1.6                          |
| D180-H199     | -1.0    | -1.4                | -0.3            | -0.7       | -2.5      | -4.4      |                               |
| <b>MI-836</b> | Tyr276  | -10.7               | -14.8           | 2.5        | -2.9      | -6.3      | -18.1                         |
|               | Asn282  | -5.1                | -6.9            | -0.3       | -2.4      | -5.3      | -11.1                         |
|               | Met278  | -1.5                | -6.8            | 5.5        | 4.0       | -4.2      | -14.7                         |
|               | Glu179  | -2.6                | -2.9            | -2.3       | -3.6      | -4.7      | -5.2                          |
|               | Tyr323  | -1.0                | -3.2            | 3.9        | 2.9       | -3.3      | -11.7                         |
|               | Tyr319  | 1.4                 | -4.8            | 10.1       | 8.6       | 0.0       | -11.0                         |
|               | Ser178  | -1.0                | -1.7            | 0.2        | -0.4      | -1.9      | -3.3                          |
|               | Glu363  | -1.7                | -1.7            | -1.7       | -2.8      | -3.3      | -2.4                          |
|               | His181  | -2.1                | -3.1            | -0.4       | -0.9      | -2.8      | -6.2                          |
|               | Phe238  | -0.7                | -1.4            | 1.1        | 0.7       | -1.6      | -4.4                          |
|               | Asp285  | 1.5                 | 1.5             | 1.5        | 0.3       | -0.2      | 1.3                           |
|               | Ala182  | -0.6                | -1.1            | 0.8        | 0.5       | -1.2      | -3.5                          |
| Cys241        | -1.2    | -1.6                | -0.4            | -0.6       | -1.3      | -2.9      |                               |
| D180-H199     | -0.7    | -1.0                | -0.1            | -0.4       | -1.9      | -3.5      |                               |
| <b>MI-2</b>   | Tyr276  | -13.1               | -17.4           | 1.3        | -4.9      | -7.8      | -20.5                         |
|               | Asn282  | -4.5                | -7.2            | 0.8        | -1.5      | -4.7      | -10.4                         |
|               | Met278  | -1.6                | -6.6            | 4.8        | 3.5       | -4.6      | -14.9                         |

| Inhibitor     | Residue | $E_{EL,MTP}^{(10)}$ | $E_{EL}^{(10)}$ | $E^{(10)}$ | $E_{SCF}$ | $E_{MP2}$ | $E_{EL,MTP}^{(10)} + E_{Das}$ |
|---------------|---------|---------------------|-----------------|------------|-----------|-----------|-------------------------------|
| <b>MI-2</b>   | Glu179  | -2.9                | -3.3            | -2.5       | -3.8      | -5.0      | -5.7                          |
|               | Tyr323  | -0.2                | -2.6            | 3.9        | 3.1       | -3.1      | -10.4                         |
|               | Tyr319  | 1.2                 | -2.7            | 7.0        | 6.0       | -1.2      | -11.3                         |
|               | Ser178  | -0.5                | -1.3            | 1.2        | 0.5       | -1.0      | -3.0                          |
|               | Glu363  | 1.7                 | -1.8            | -1.5       | -3.5      | -4.0      | -2.4                          |
|               | His181  | -0.2                | -1.2            | 1.7        | 1.3       | -0.7      | -4.6                          |
|               | Phe238  | -0.5                | -1.3            | 1.3        | 0.9       | -1.5      | -4.2                          |
|               | Asp285  | 2.0                 | 2.1             | 2.1        | 0.8       | 0.2       | 1.8                           |
|               | Ala182  | -0.1                | -0.1            | -0.1       | -0.1      | -0.4      | -3.9                          |
|               | Cys241  | -0.8                | -1.4            | 1.1        | 0.7       | -1.1      | -1.1                          |
| D180–H199     | -0.8    | -1.1                | 0.1             | -0.2       | -1.9      | -4.0      |                               |
| <b>MI-273</b> | Tyr276  | -10.4               | -14.4           | 3.0        | -2.3      | -5.7      | -17.9                         |
|               | Asn282  | -4.6                | -6.5            | 0.1        | -1.9      | -4.8      | -10.6                         |
|               | Met278  | -1.8                | -6.9            | 5.3        | 3.8       | -4.3      | -15.0                         |
|               | Glu179  | -2.7                | -3.2            | -2.1       | -3.4      | -4.3      | -5.9                          |
|               | Tyr323  | -1.2                | -3.4            | 3.7        | 2.7       | -3.5      | -11.9                         |
|               | Tyr319  | 1.3                 | -4.9            | 10.0       | 8.4       | -0.2      | -11.2                         |
|               | Ser178  | 0.7                 | -0.9            | 3.4        | 2.8       | 0.6       | -2.6                          |
|               | Glu363  | -1.9                | -1.9            | -1.9       | -3.1      | -3.5      | -2.6                          |
|               | His181  | 0.8                 | -2.3            | 6.6        | 5.9       | 3.0       | -7.1                          |
|               | Phe238  | -0.6                | -1.4            | 1.4        | 1.1       | -1.3      | -4.7                          |
|               | Asp285  | 0.4                 | 0.4             | 0.4        | -0.9      | -1.2      | 0.2                           |
|               | Ala182  | -0.4                | -0.9            | 1.0        | 0.7       | -1.0      | -3.3                          |
|               | Cys241  | 0.3                 | -0.2            | 1.2        | 1.0       | 0.0       | -2.0                          |
| D180–H199     | -1.9    | -2.8                | 0.0             | -0.5       | -1.9      | -7.0      |                               |



| Inhibitor     | Residue | $E_{EL,MTP}^{(10)}$ | $E_{EL}^{(10)}$ | $E^{(10)}$ | $E_{SCF}$ | $E_{MP2}$ | $E_{EL,MTP}^{(10)} + E_{Das}$ |
|---------------|---------|---------------------|-----------------|------------|-----------|-----------|-------------------------------|
| <b>MI-20</b>  | Tyr276  | -11.8               | -15.9           | 1.4        | -4.2      | -7.4      | -19.2                         |
|               | Asn282  | -5.8                | -8.2            | 0.5        | -2.0      | -5.1      | -11.8                         |
|               | Met278  | -1.5                | -6.3            | 5.2        | 3.8       | -4.3      | -14.7                         |
|               | Glu179  | -2.3                | -2.7            | -2.0       | -3.3      | -4.6      | -5.3                          |
|               | Tyr323  | -0.3                | -3.1            | 4.5        | 3.6       | -2.9      | -10.9                         |
|               | Tyr319  | 1.1                 | -2.9            | 7.0        | 6.0       | -1.2      | -11.3                         |
|               | Ser178  | -0.4                | -1.1            | 0.7        | 0.2       | -1.4      | -2.7                          |
|               | Glu363  | -1.2                | -1.3            | -1.0       | -2.9      | -3.6      | -1.8                          |
|               | His181  | -0.2                | -1.4            | 2.3        | 1.8       | -0.7      | -5.2                          |
|               | Phe238  | -0.4                | -1.1            | 0.8        | 0.6       | -1.7      | -3.8                          |
|               | Asp285  | 1.9                 | 1.9             | 1.9        | 0.6       | 0.1       | 1.7                           |
|               | Ala182  | 0.1                 | 0.0             | 0.6        | 0.5       | -0.3      | -3.3                          |
| Cys241        | -0.4    | -1.0                | 1.1             | 0.8        | -1.0      | -1.1      |                               |
| D180–H199     | -0.6    | -1.0                | 0.4             | -0.0       | -2.2      | -4.7      |                               |
| <b>MI-2-4</b> | Tyr276  | -3.5                | -5.8            | 1.8        | -0.2      | -3.5      | -9.4                          |
|               | Asn282  | -3.9                | -4.9            | -1.2       | -2.5      | -4.7      | -8.5                          |
|               | Met278  | -2.5                | -9.5            | 8.6        | 6.4       | -3.0      | -18.3                         |
|               | Glu179  | -2.9                | -3.5            | -2.5       | -4.0      | -5.2      | -5.9                          |
|               | Tyr323  | -1.1                | -3.3            | 3.8        | 2.8       | -3.3      | -11.8                         |
|               | Tyr319  | 1.3                 | -4.9            | 10.0       | 8.4       | -0.2      | -11.2                         |
|               | Ser178  | -0.1                | -0.6            | 0.8        | 0.2       | -1.2      | -2.0                          |
|               | Glu363  | -2.3                | -2.3            | -2.3       | -3.5      | -3.8      | -3.0                          |
|               | His181  | -2.7                | -5.8            | 3.2        | 2.0       | -1.1      | -11.6                         |
|               | Phe238  | -0.7                | -0.9            | 0.1        | -0.1      | -1.8      | -3.6                          |
| Asp285        | 0.5     | 0.5                 | 0.5             | -0.7       | -1.1      | 0.3       |                               |

| Inhibitor     | Residue   | $E_{EL,MTP}^{(10)}$ | $E_{EL}^{(10)}$ | $E^{(10)}$ | $E_{SCF}$ | $E_{MP2}$ | $E_{EL,MTP}^{(10)} + E_{Das}$ |
|---------------|-----------|---------------------|-----------------|------------|-----------|-----------|-------------------------------|
| <b>MI-2-4</b> | Ala182    | -0.5                | -0.6            | -0.4       | -0.4      | -1.3      | -1.8                          |
|               | Cys241    | -0.1                | -1.7            | 3.8        | 3.2       | 1.8       | -4.0                          |
|               | D180-H199 | -1.4                | -4.9            | 7.1        | 5.4       | 1.5       | -9.9                          |
| <b>MI-326</b> | Tyr276    | -11.5               | -15.2           | 1.4        | -4.0      | -7.1      | -18.7                         |
|               | Asn282    | -4.7                | -7.0            | 1.2        | -1.2      | -4.3      | -11.3                         |
|               | Met278    | -1.7                | -6.7            | 4.7        | 3.2       | -4.7      | -14.3                         |
|               | Glu179    | -6.6                | -6.9            | -6.3       | -7.5      | -8.2      | -9.3                          |
|               | Tyr323    | -1.2                | -4.0            | 3.3        | 2.2       | -4.1      | -12.0                         |
|               | Tyr319    | 0.4                 | -2.7            | 5.4        | 4.4       | -1.9      | -8.6                          |
|               | Ser178    | -1.6                | -2.3            | -0.5       | -1.2      | -2.2      | -3.8                          |
|               | Glu363    | -1.4                | -1.4            | -1.4       | -2.1      | -2.2      | -1.6                          |
|               | His181    | -1.7                | -3.0            | 1.2        | 0.6       | -1.2      | -7.4                          |
|               | Phe238    | -0.8                | -1.5            | 1.2        | 0.8       | -1.5      | -4.6                          |
|               | Asp285    | 6.1                 | 6.1             | 6.1        | 4.9       | 4.2       | 5.9                           |
|               | Ala182    | 0.3                 | -0.1            | 0.8        | 0.7       | -0.1      | -4.0                          |
|               | Cys241    | -0.8                | -1.4            | 1.0        | 0.6       | -1.1      | -1.6                          |
| D180-H199     | -0.9      | -1.3                | -0.2            | -0.6       | -2.4      | -4.3      |                               |
| <b>MI-19</b>  | Tyr276    | -11.8               | -15.5           | 1.2        | -4.3      | -7.3      | -19.2                         |
|               | Asn282    | -5.3                | -7.6            | 0.6        | -1.8      | -4.7      | -11.8                         |
|               | Met278    | -1.9                | -6.9            | 4.5        | 3.0       | -4.9      | -14.6                         |
|               | Glu179    | -5.1                | -5.5            | -4.8       | -6.0      | -7.0      | -5.1                          |
|               | Tyr323    | -2.2                | -5.4            | 3.7        | 2.6       | -4.0      | -11.0                         |
|               | Tyr319    | 0.3                 | -2.7            | 5.5        | 4.4       | -2.3      | -11.3                         |
|               | Ser178    | -0.5                | -1.3            | 0.7        | 0.1       | -1.3      | -2.8                          |
|               | Glu363    | 2.4                 | 2.4             | 2.4        | 1.7       | 1.1       | -1.9                          |

| Inhibitor     | Residue   | $E_{EL,MTP}^{(10)}$ | $E_{EL}^{(10)}$ | $E^{(10)}$ | $E_{SCF}$ | $E_{MP2}$ | $E_{EL,MTP}^{(10)} + E_{Das}$ |
|---------------|-----------|---------------------|-----------------|------------|-----------|-----------|-------------------------------|
| <b>MI-19</b>  | His181    | -1.1                | -2.1            | 0.2        | -0.2      | -1.8      | -4.7                          |
|               | Phe238    | -0.6                | -1.2            | 1.1        | 0.8       | -1.4      | -3.6                          |
|               | Asp285    | 6.1                 | 6.1             | 6.1        | 5.0       | 4.3       | 1.6                           |
|               | Ala182    | -0.3                | -0.4            | -0.1       | -0.2      | -0.7      | -3.3                          |
|               | Cys241    | -0.9                | -1.4            | 0.9        | 0.6       | -1.1      | -1.0                          |
|               | D180–H199 | -1.5                | -1.8            | -0.7       | -1.1      | -2.5      | -3.6                          |
| <b>MI-333</b> | Tyr276    | -11.5               | -15.2           | 1.4        | -4.0      | -7.1      | -18.6                         |
|               | Asn282    | -5.1                | -7.4            | 0.7        | -1.6      | -4.6      | -11.7                         |
|               | Met278    | -1.8                | -6.8            | 4.6        | 3.1       | -4.8      | -14.4                         |
|               | Glu179    | -6.0                | -6.3            | -5.6       | -6.9      | -7.7      | -8.7                          |
|               | Tyr323    | -1.7                | -4.8            | 3.1        | 1.9       | -4.7      | -13.1                         |
|               | Tyr319    | 0.1                 | -3.1            | 5.4        | 4.3       | -2.1      | -9.5                          |
|               | Ser178    | -1.7                | -2.4            | -0.6       | -1.2      | -2.3      | -3.9                          |
|               | Glu363    | 1.1                 | 1.1             | 1.1        | 0.5       | 0.2       | 0.8                           |
|               | His181    | -1.7                | -3.0            | 1.2        | 0.6       | -1.2      | -7.4                          |
|               | Phe238    | -0.8                | -1.5            | 1.2        | 0.8       | -1.5      | -4.7                          |
|               | Asp285    | 3.8                 | 3.8             | 3.8        | 2.7       | 2.4       | 3.6                           |
|               | Ala182    | -0.9                | -1.4            | 0.9        | 0.5       | -1.2      | -4.1                          |
| Cys241        | 0.3       | -0.1                | 0.8             | 0.7        | -0.1      | -1.5      |                               |
| D180–H199     | -0.8      | -1.2                | -0.1            | -0.5       | -2.3      | -4.2      |                               |
| <b>MI-12</b>  | Tyr276    | -11.0               | -15.1           | 2.2        | -3.2      | -6.7      | -18.4                         |
|               | Asn282    | -6.4                | -8.4            | -1.7       | -3.9      | -6.5      | -12.3                         |
|               | Met278    | -1.5                | -6.8            | 5.5        | 4.1       | -3.9      | -14.5                         |
|               | Glu179    | -3.1                | -3.5            | -2.9       | -4.0      | -5.2      | -5.6                          |
|               | Tyr323    | -0.1                | -1.8            | 2.4        | 1.8       | -1.2      | -5.2                          |

| Inhibitor    | Residue   | $E_{EL,MTP}^{(10)}$ | $E_{EL}^{(10)}$ | $E^{(10)}$ | $E_{SCF}$ | $E_{MP2}$ | $E_{EL,MTP}^{(10)} + E_{Das}$ |
|--------------|-----------|---------------------|-----------------|------------|-----------|-----------|-------------------------------|
| <b>MI-12</b> | Tyr319    | 0.0                 | -1.4            | 2.9        | 2.4       | -0.8      | -4.9                          |
|              | Ser178    | -0.5                | -1.2            | 0.8        | 0.1       | -1.4      | -2.7                          |
|              | Glu363    | 0.7                 | 0.7             | 0.7        | 0.0       | -0.5      | 0.5                           |
|              | His181    | -0.8                | -1.9            | 0.7        | 0.3       | -1.5      | -4.6                          |
|              | Phe238    | -0.4                | -1.1            | 1.3        | 0.9       | -1.3      | -3.7                          |
|              | Asp285    | -1.0                | -1.0            | -1.0       | -1.9      | -1.8      | -1.2                          |
|              | Ala182    | -0.6                | -1.2            | 0.8        | 0.5       | -1.2      | -3.5                          |
|              | Cys241    | -0.4                | -0.5            | -0.1       | -0.2      | -0.8      | -1.5                          |
|              | D180-H199 | -0.7                | -0.9            | 0.0        | -0.3      | -1.7      | -3.4                          |
| <b>MI-16</b> | Tyr276    | -10.9               | -14.9           | 2.4        | -3.1      | -6.5      | -18.3                         |
|              | Asn282    | -5.0                | -6.8            | -0.1       | -2.3      | -5.1      | -10.9                         |
|              | Met278    | -1.5                | -6.8            | 5.5        | 4.0       | -4.2      | -14.6                         |
|              | Glu179    | -2.6                | -2.9            | -2.4       | -3.5      | -4.9      | -5.1                          |
|              | Tyr323    | 1.4                 | -1.1            | 2.9        | 2.3       | -1.8      | -5.1                          |
|              | Tyr319    | 0.8                 | -4.3            | 9.0        | 7.5       | 0.3       | -9.0                          |
|              | Ser178    | -0.7                | -1.4            | 0.6        | -0.1      | -1.6      | -2.9                          |
|              | Glu363    | -0.2                | -0.2            | -0.2       | -0.9      | -1.2      | -0.4                          |
|              | His181    | -0.9                | -1.9            | 0.6        | 0.2       | -1.6      | -4.7                          |
|              | Phe238    | -0.4                | -1.1            | 1.3        | 0.9       | -1.3      | -3.7                          |
|              | Asp285    | 2.1                 | 2.2             | 2.2        | 1.1       | 1.1       | 1.9                           |
|              | Ala182    | -0.5                | -1.0            | 0.9        | 0.6       | -1.1      | -3.4                          |
|              | Cys241    | -0.4                | -0.5            | -0.1       | -0.2      | -0.8      | -1.5                          |
| D180-H199    | -0.6      | -0.9                | 0.0             | -0.3       | -1.7      | -3.3      |                               |
| <b>MI-4</b>  | Tyr276    | -11.1               | -15.1           | 2.2        | -3.3      | -6.7      | -18.5                         |
|              | Asn282    | -6.2                | -8.2            | -1.5       | -3.8      | -6.4      | -12.1                         |

| Inhibitor    | Residue | $E_{EL,MTP}^{(10)}$ | $E_{EL}^{(10)}$ | $E^{(10)}$ | $E_{SCF}$ | $E_{MP2}$ | $E_{EL,MTP}^{(10)} + E_{Das}$ |
|--------------|---------|---------------------|-----------------|------------|-----------|-----------|-------------------------------|
| <b>MI-4</b>  | Met278  | -1.3                | -6.7            | 5.6        | 4.2       | -3.8      | -14.3                         |
|              | Glu179  | -2.2                | -2.5            | -1.9       | -3.0      | -4.3      | -4.7                          |
|              | Tyr323  | 0.1                 | -1.6            | 2.6        | 2.0       | -1.0      | -5.0                          |
|              | Tyr319  | 0.1                 | -1.3            | 3.0        | 2.5       | -0.7      | -4.8                          |
|              | Ser178  | -0.4                | -1.1            | 0.8        | 0.2       | -1.4      | -2.6                          |
|              | Glu363  | 0.4                 | 0.4             | 0.4        | -0.3      | -0.7      | 0.2                           |
|              | His181  | -0.8                | -1.8            | 0.7        | 0.3       | -1.5      | -4.6                          |
|              | Phe238  | -0.4                | -1.1            | 1.3        | 0.9       | -1.3      | -3.7                          |
|              | Asp285  | -0.1                | -0.1            | -0.1       | -1.0      | -1.0      | -0.3                          |
|              | Ala182  | -0.6                | -1.2            | 0.8        | 0.5       | -1.2      | -3.5                          |
|              | Cys241  | -0.4                | -0.5            | -0.1       | -0.2      | -0.8      | -1.5                          |
| D180-H199    | -0.5    | -0.8                | 0.2             | -0.1       | -1.6      | -3.2      |                               |
| <b>MI-10</b> | Tyr276  | -11.8               | -15.8           | 1.4        | -4.2      | -7.3      | -19.2                         |
|              | Asn282  | -5.8                | -8.2            | 0.4        | -2.0      | -5.1      | -11.8                         |
|              | Met278  | -1.4                | -6.2            | 5.3        | 3.9       | -4.2      | -14.6                         |
|              | Glu179  | -4.2                | -4.5            | -3.8       | -5.0      | -6.4      | -6.8                          |
|              | Tyr323  | 1.1                 | -1.1            | 4.2        | 3.6       | -1.7      | -6.8                          |
|              | Tyr319  | 0.0                 | -3.5            | 7.2        | 5.9       | -1.1      | -13.2                         |
|              | Ser178  | -0.4                | -1.1            | 0.8        | 0.2       | -1.3      | -2.6                          |
|              | Glu363  | 0.6                 | 0.6             | 0.6        | -0.1      | -0.4      | 0.4                           |
|              | His181  | -0.2                | -1.3            | 2.1        | 1.7       | -0.4      | -4.8                          |
|              | Phe238  | -0.4                | -1.1            | 0.9        | 0.6       | -1.5      | -3.6                          |
|              | Asp285  | 2.5                 | 2.5             | 2.5        | 1.5       | 1.5       | 2.4                           |
| Ala182       | 0.2     | 0.0                 | 0.6             | 0.5        | -0.2      | -3.3      |                               |
| Cys241       | -0.4    | -1.0                | 1.2             | 0.8        | -0.9      | -1.0      |                               |

| Inhibitor    | Residue   | $E_{EL,MTP}^{(10)}$ | $E_{EL}^{(10)}$ | $E^{(10)}$ | $E_{SCF}$ | $E_{MP2}$ | $E_{EL,MTP}^{(10)} + E_{Das}$ |
|--------------|-----------|---------------------|-----------------|------------|-----------|-----------|-------------------------------|
| <b>MI-10</b> | D180–H199 | -0.8                | -1.1            | 0.0        | -0.3      | -1.9      | -3.7                          |
|              | Tyr276    | -11.9               | 16.0            | 1.3        | -4.3      | -7.5      | -19.3                         |
|              | Asn282    | -6.2                | -8.6            | 0.1        | -2.4      | -5.4      | -12.1                         |
|              | Met278    | -1.3                | -6.1            | 5.3        | 4.0       | -4.1      | -14.4                         |
|              | Glu179    | -2.0                | -2.3            | -1.6       | -2.7      | -4.2      | -4.5                          |
|              | Tyr323    | 1.0                 | -0.9            | 3.9        | 3.4       | -1.6      | -6.6                          |
|              | Tyr319    | 1.3                 | -1.7            | 6.4        | 5.3       | -0.5      | -9.9                          |
| <b>MI-11</b> | Ser178    | -0.3                | -1.0            | 0.9        | 0.3       | -1.3      | -2.5                          |
|              | Glu363    | -0.7                | -0.7            | -0.7       | -1.4      | -1.5      | -0.8                          |
|              | His181    | -0.2                | -1.2            | 2.2        | 1.7       | -0.3      | -4.7                          |
|              | Phe238    | -0.4                | -1.1            | 0.8        | 0.5       | -1.5      | -3.6                          |
|              | Asp285    | 0.5                 | 0.5             | 0.5        | -0.5      | -0.3      | 0.3                           |
|              | Ala182    | 0.1                 | 0.0             | 0.6        | 0.5       | -0.2      | -3.3                          |
|              | Cys241    | -0.4                | -1.1            | 1.1        | 0.8       | -1.0      | -1.0                          |
|              | D180–H199 | -0.5                | -0.8            | 0.3        | 0.0       | -1.6      | -3.4                          |
|              | Tyr276    | -10.8               | -14.8           | 2.5        | -2.9      | -6.3      | -18.2                         |
|              | Asn282    | -4.8                | -6.7            | 0.0        | -2.1      | -5.0      | -10.7                         |
|              | Met278    | -1.6                | -6.8            | 5.4        | 3.9       | -4.3      | -14.7                         |
|              | Glu179    | -4.7                | -5.0            | -4.4       | -5.6      | -6.7      | -7.2                          |
| <b>MI-6</b>  | Tyr323    | 0.3                 | -1.9            | 2.0        | 1.4       | -2.6      | -6.1                          |
|              | Tyr319    | 0.3                 | -4.3            | 8.0        | 6.5       | -0.3      | -9.3                          |
|              | Ser178    | -0.8                | -1.5            | 0.5        | -0.2      | -1.7      | -3.0                          |
|              | Glu363    | -0.2                | -0.2            | -0.2       | -0.8      | -0.9      | -0.4                          |
|              | His181    | -1.0                | -2.0            | 0.5        | 0.1       | -1.7      | -4.8                          |
|              | Phe238    | -0.4                | -1.1            | 1.3        | 0.9       | -1.3      | -3.7                          |

| Inhibitor   | Residue   | $E_{EL,MTP}^{(10)}$ | $E_{EL}^{(10)}$ | $E^{(10)}$ | $E_{SCF}$ | $E_{MPP2}$ | $E_{EL,MTP}^{(10)} + E_{Das}$ |
|-------------|-----------|---------------------|-----------------|------------|-----------|------------|-------------------------------|
| <b>MI-6</b> | Asp285    | 6.0                 | 6.0             | 6.0        | 5.1       | 4.4        | 5.8                           |
|             | Ala182    | -0.4                | -1.0            | 1.0        | 0.7       | -1.0       | -3.3                          |
|             | Cys241    | -0.4                | -0.5            | -0.1       | -0.2      | -0.8       | -1.5                          |
|             | D180-H199 | -0.9                | -1.2            | -0.3       | -0.6      | -2.0       | -3.6                          |

Table S3: Correlation between the experimental data and the interaction energy calculated at the consecutive levels of theory upon removal of a given amino acid residue from the binding site model.

| Removed residue | R <sup>a</sup> at a given level of theory |                 |            |           |           |                               |
|-----------------|-------------------------------------------|-----------------|------------|-----------|-----------|-------------------------------|
|                 | $E_{EL,MTP}^{(10)}$                       | $E_{EL}^{(10)}$ | $E^{(10)}$ | $E_{SCF}$ | $E_{MP2}$ | $E_{EL,MTP}^{(10)} + E_{Das}$ |
| Tyr276          | -0.64                                     | -0.66           | 0.19       | 0.02      | -0.67     | -0.81                         |
| Tyr323          | -0.43                                     | -0.74           | 0.10       | -0.02     | -0.36     | -0.80                         |
| Tyr319          | -0.74                                     | -0.88           | 0.09       | -0.10     | -0.54     | -0.90                         |
| Asn282          | -0.72                                     | -0.80           | 0.11       | -0.04     | -0.62     | -0.85                         |
| Met278          | -0.58                                     | -0.89           | 0.21       | 0.06      | -0.56     | -0.89                         |
| Glu179          | -0.51                                     | -0.73           | 0.28       | 0.14      | -0.46     | -0.85                         |
| Ser178          | -0.60                                     | -0.82           | 0.25       | 0.11      | -0.56     | -0.85                         |
| Glu363          | -0.42                                     | -0.80           | 0.19       | 0.11      | -0.34     | -0.87                         |
| His181          | -0.57                                     | -0.88           | 0.14       | -0.02     | -0.64     | -0.88                         |
| Phe238          | -0.60                                     | -0.86           | 0.18       | 0.04      | -0.54     | -0.87                         |
| Asp285          | -0.51                                     | -0.76           | 0.13       | 0.02      | -0.43     | -0.84                         |
| Cys241          | -0.63                                     | -0.86           | 0.17       | 0.03      | -0.55     | -0.86                         |
| Ala182          | -0.65                                     | -0.89           | 0.13       | -0.03     | -0.65     | -0.88                         |
| Asp180–His191   | -0.59                                     | -0.89           | 0.17       | 0.01      | -0.61     | -0.90                         |
| All included    | -0.63                                     | -0.87           | 0.17       | 0.03      | -0.55     | -0.87                         |

<sup>a</sup>Correlation coefficient between the energy obtained at a given level of theory and the experimental inhibitory activity.



Table S4: Total menin-inhibitor interaction energy<sup>a</sup> at the consecutive levels of theory calculated for novel menin-MLL inhibitors.

| inhibitor    | $pIC_{50}$ | $E_{EL,MTP}^{(10)}$ | $E_{EL}^{(10)}$ | $E^{(10)}$ | $E_{SCF}$ | $E_{MP2}$ | $E_{EL,MTP}^{(10)} + E_{Das}$ |
|--------------|------------|---------------------|-----------------|------------|-----------|-----------|-------------------------------|
| <b>1</b>     | 6.72       | -20.2               | -43.9           | 26.5       | 9.0       | -33.4     | -92.1                         |
| <b>2</b>     | 6.19       | -22.1               | -43.7           | 22.3       | 5.5       | -33.8     | -92.4                         |
| <b>3</b>     | 5.89       | -22.5               | -43.2           | 21.3       | 4.7       | -33.6     | -91.4                         |
| <b>4</b>     | 5.85       | -24.6               | -44.2           | 18.2       | 2.0       | -33.5     | -93.9                         |
| <b>5</b>     | 5.70       | -22.4               | -44.1           | 22.2       | 5.1       | -34.5     | -93.2                         |
| <b>6</b>     | 4.70       | -20.2               | -43.1           | 26.2       | 8.9       | -30.6     | -90.6                         |
| <b>7</b>     | 3.70       | -17.5               | -35.5           | 18.8       | 4.6       | -32.1     | -83.4                         |
| $N_{pred}^b$ |            | 61.9                | 71.4            | 33.3       | 33.3      | 61.9      | 66.7                          |
| $R^c$        |            | -0.63               | -0.83           | 0.33       | 0.10      | -0.65     | -0.84                         |
| $SE^d$       |            | 1.9                 | 1.9             | 3.4        | 2.7       | 1.1       | 2.1                           |

<sup>a</sup>In units of kcal · mol<sup>-1</sup>.

<sup>b</sup>Percentage of successful predictions [%].

<sup>c</sup>Correlation coefficient between the energy obtained at a given level of theory and the experimental inhibitory activity.

<sup>d</sup>Standard error of estimate, in units of kcal · mol<sup>-1</sup>.

Table S5: Performance of empirical scoring methods for ranking the novel menin-MLL inhibitors.

| Scoring function                     | $R^a$ | $N_{pred}^b$ |
|--------------------------------------|-------|--------------|
| $E_{EL,MTP}^{(10)} + E_{Das}$        | -0.84 | 66.7         |
| LigScore2                            | -0.84 | 66.7         |
| Jain                                 | -0.76 | 76.2         |
| Ludi1                                | -0.74 | 71.4         |
| Ludi2                                | -0.69 | 61.9         |
| Ludi3                                | -0.55 | 61.9         |
| LigScore1                            | -0.54 | 52.4         |
| PLP2                                 | -0.40 | 57.1         |
| PLP1                                 | -0.40 | 47.6         |
| PMF                                  | -0.33 | 61.9         |
| PMF04                                | +0.30 | 47.6         |
| $E_{binding}$ (Discovery Studio 3.5) | +0.45 | 42.9         |
| Chemscore                            | -0.71 | 81.0         |
| Goldscore                            | -0.53 | 47.6         |
| ASP                                  | +0.05 | 52.4         |
| Binding affinity (AutoDock Vina)     | -0.63 | 61.9         |

<sup>a</sup> Correlation coefficient between the calculated binding affinity estimate and the experimental inhibitory activity expressed as  $pIC_{50}$ .

<sup>b</sup> Percentage of successful predictions [%].
